# Supplementary material
Source: PubMed Central journal article supplement (PMC5550516)

**Figure S1**

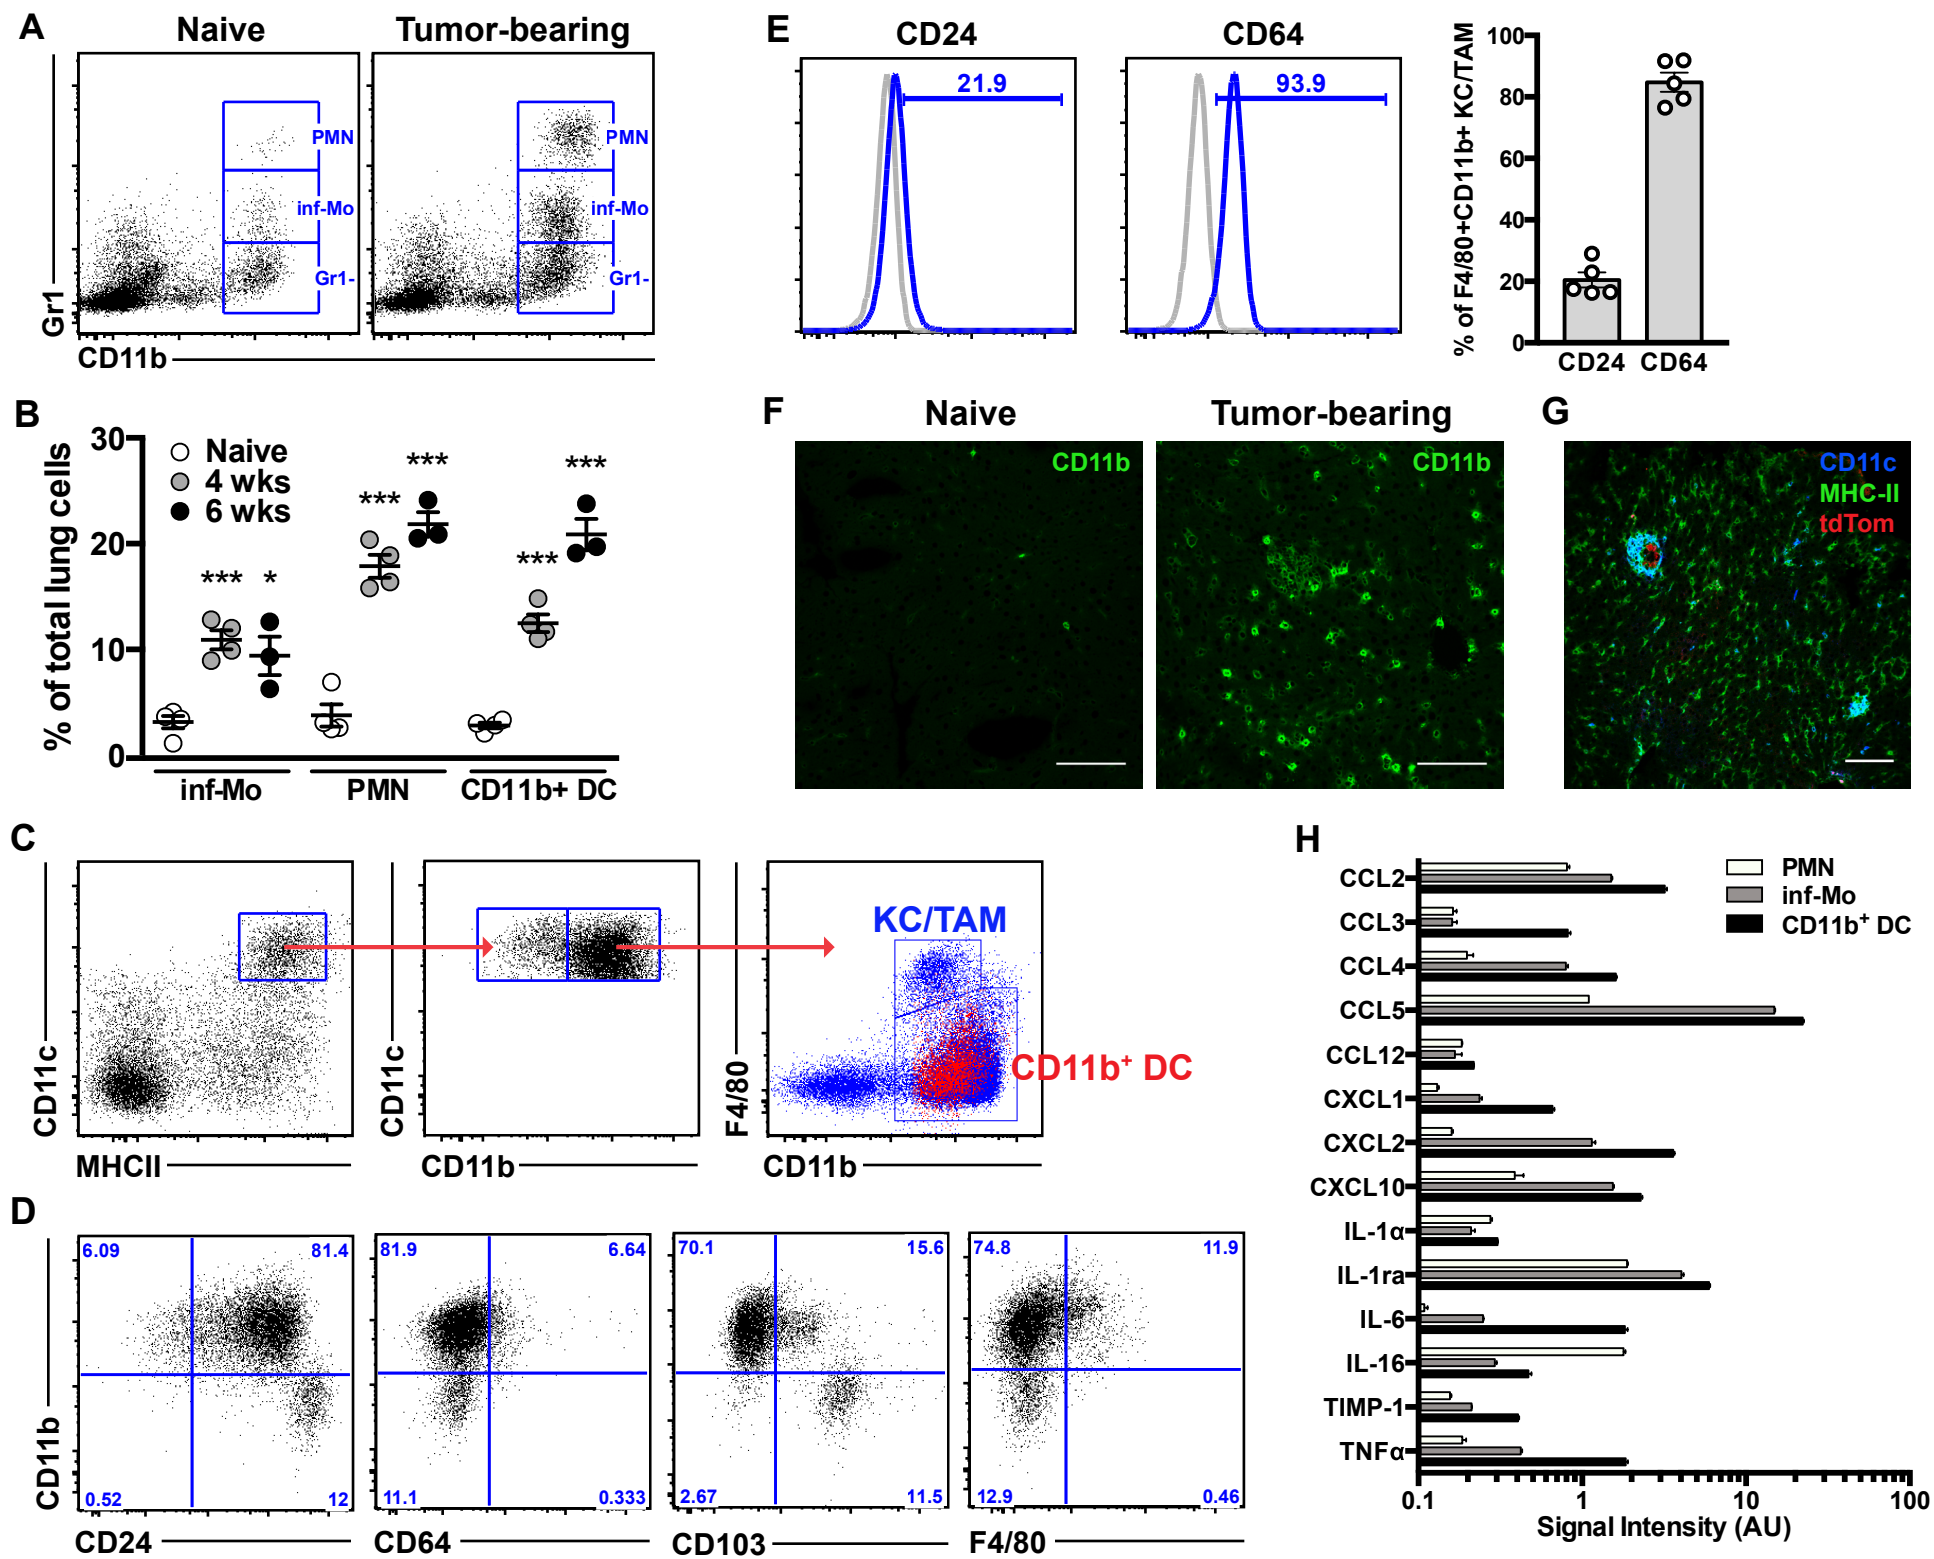

**Figure S2**

**A**

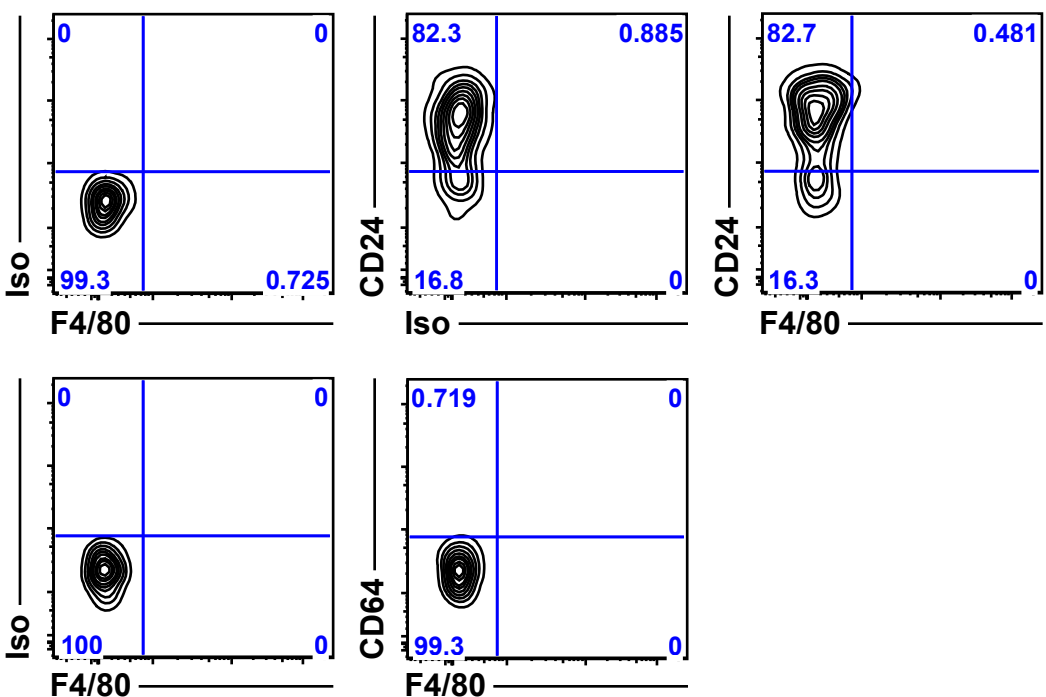

**B**

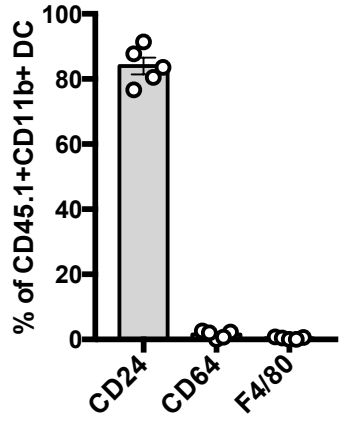

**C**

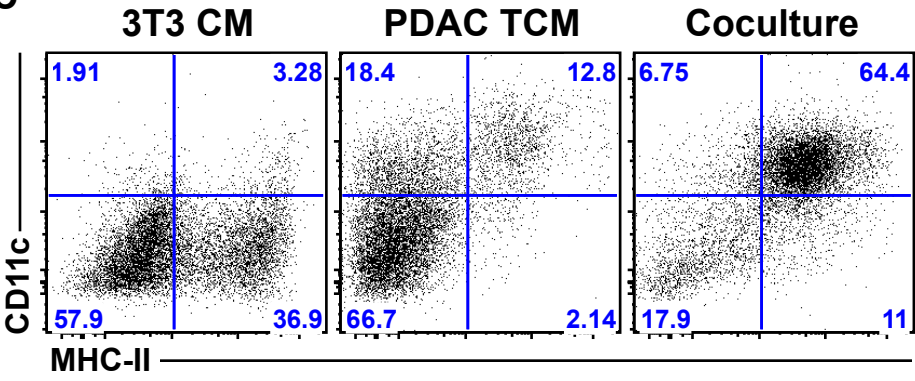

**D**

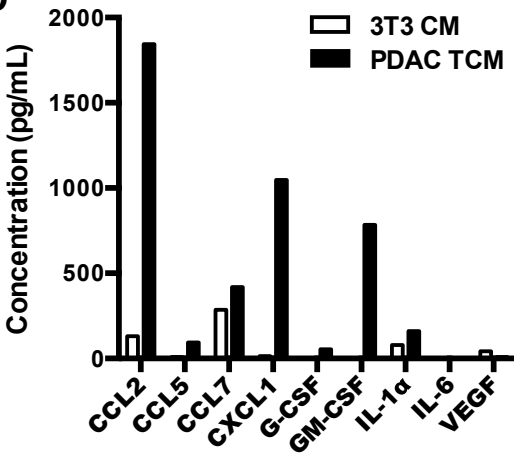

Figure S3

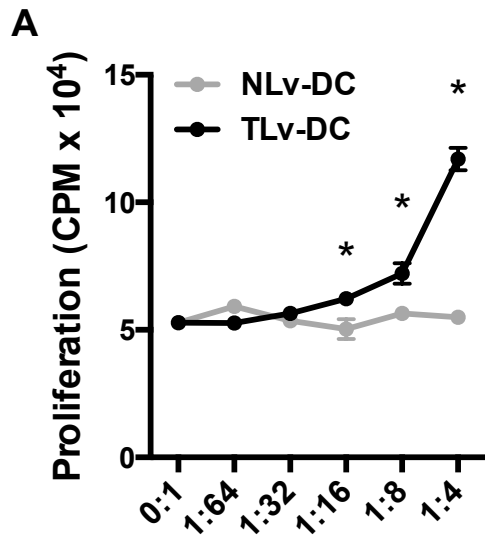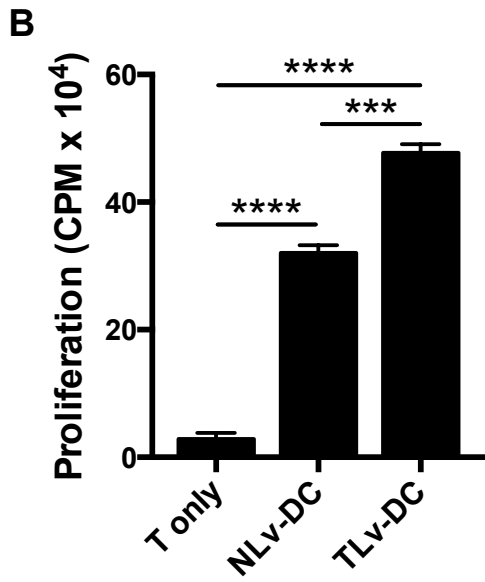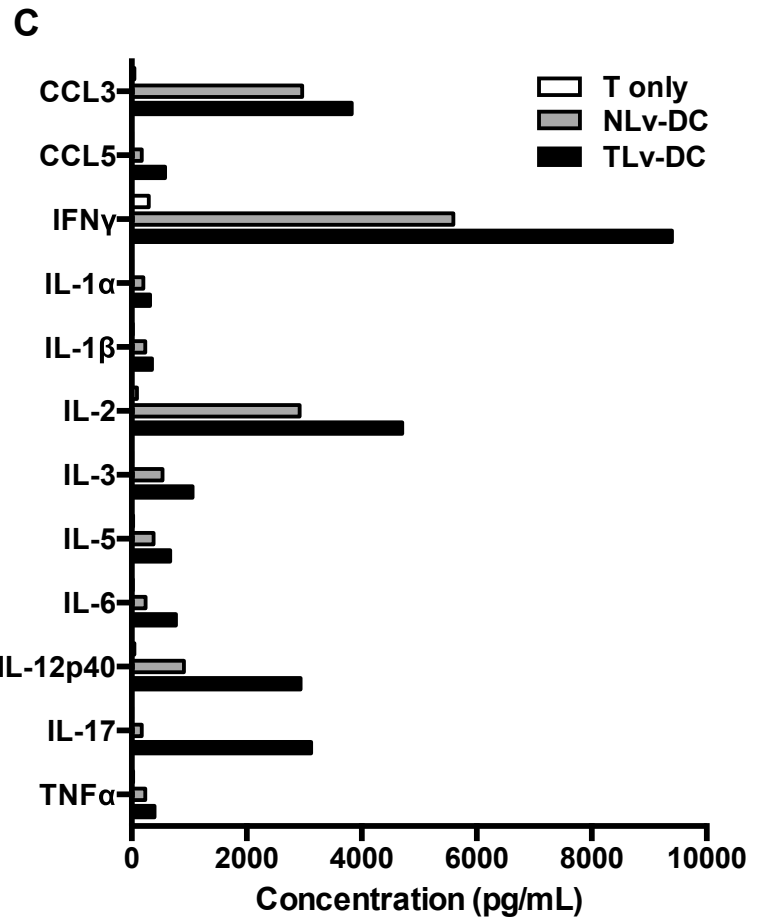

**Figure S4**

**A**

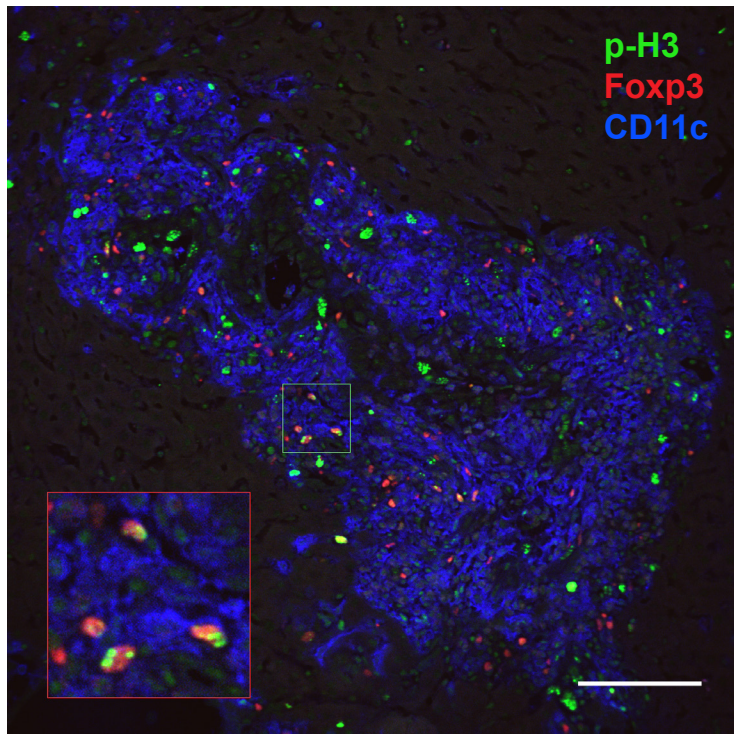

**B**

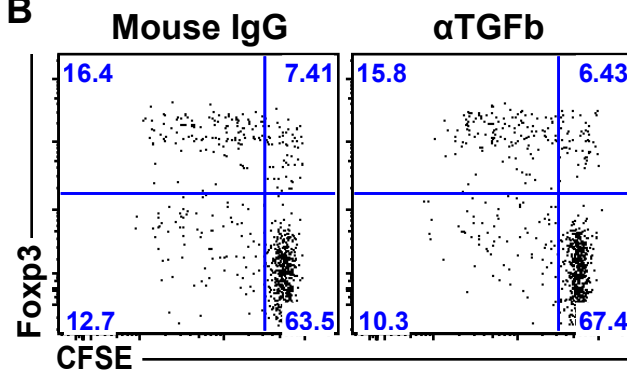

**D**

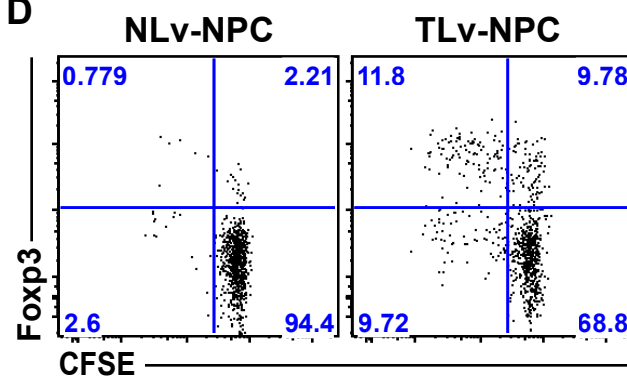

**C**

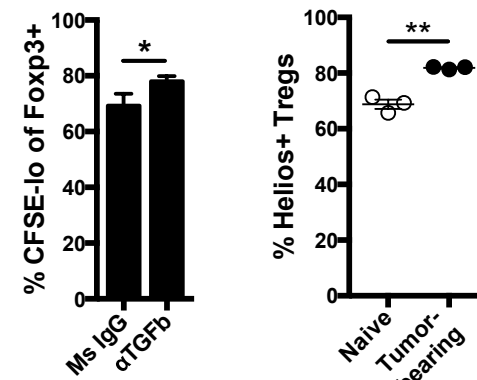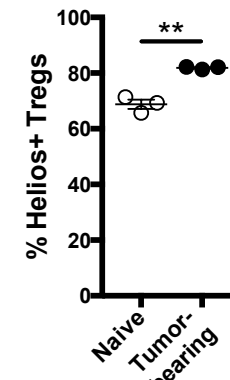

**E**

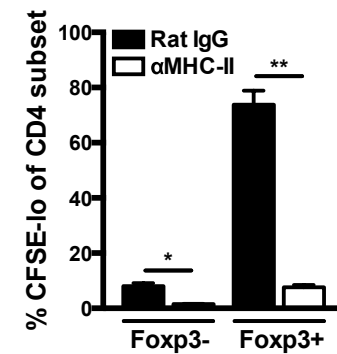

**F**

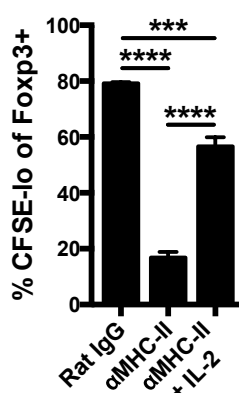

**G**

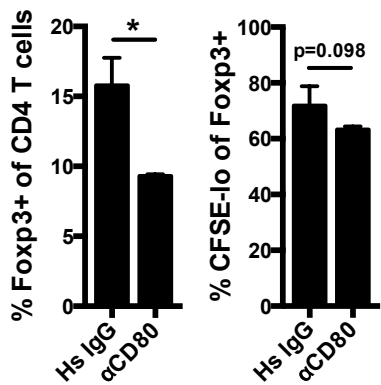

**H**

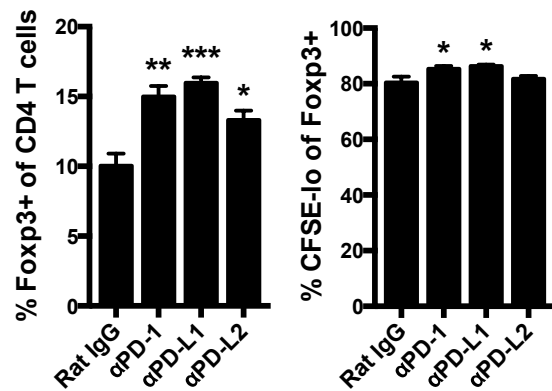

**I**

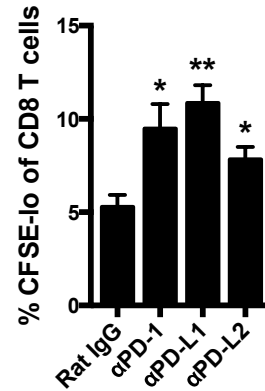

**J**

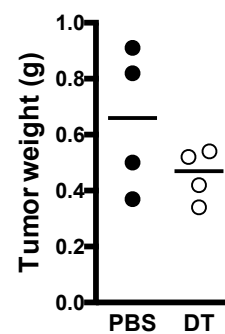

**K**

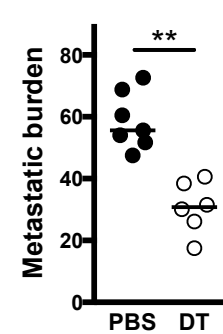

**Figure S5**

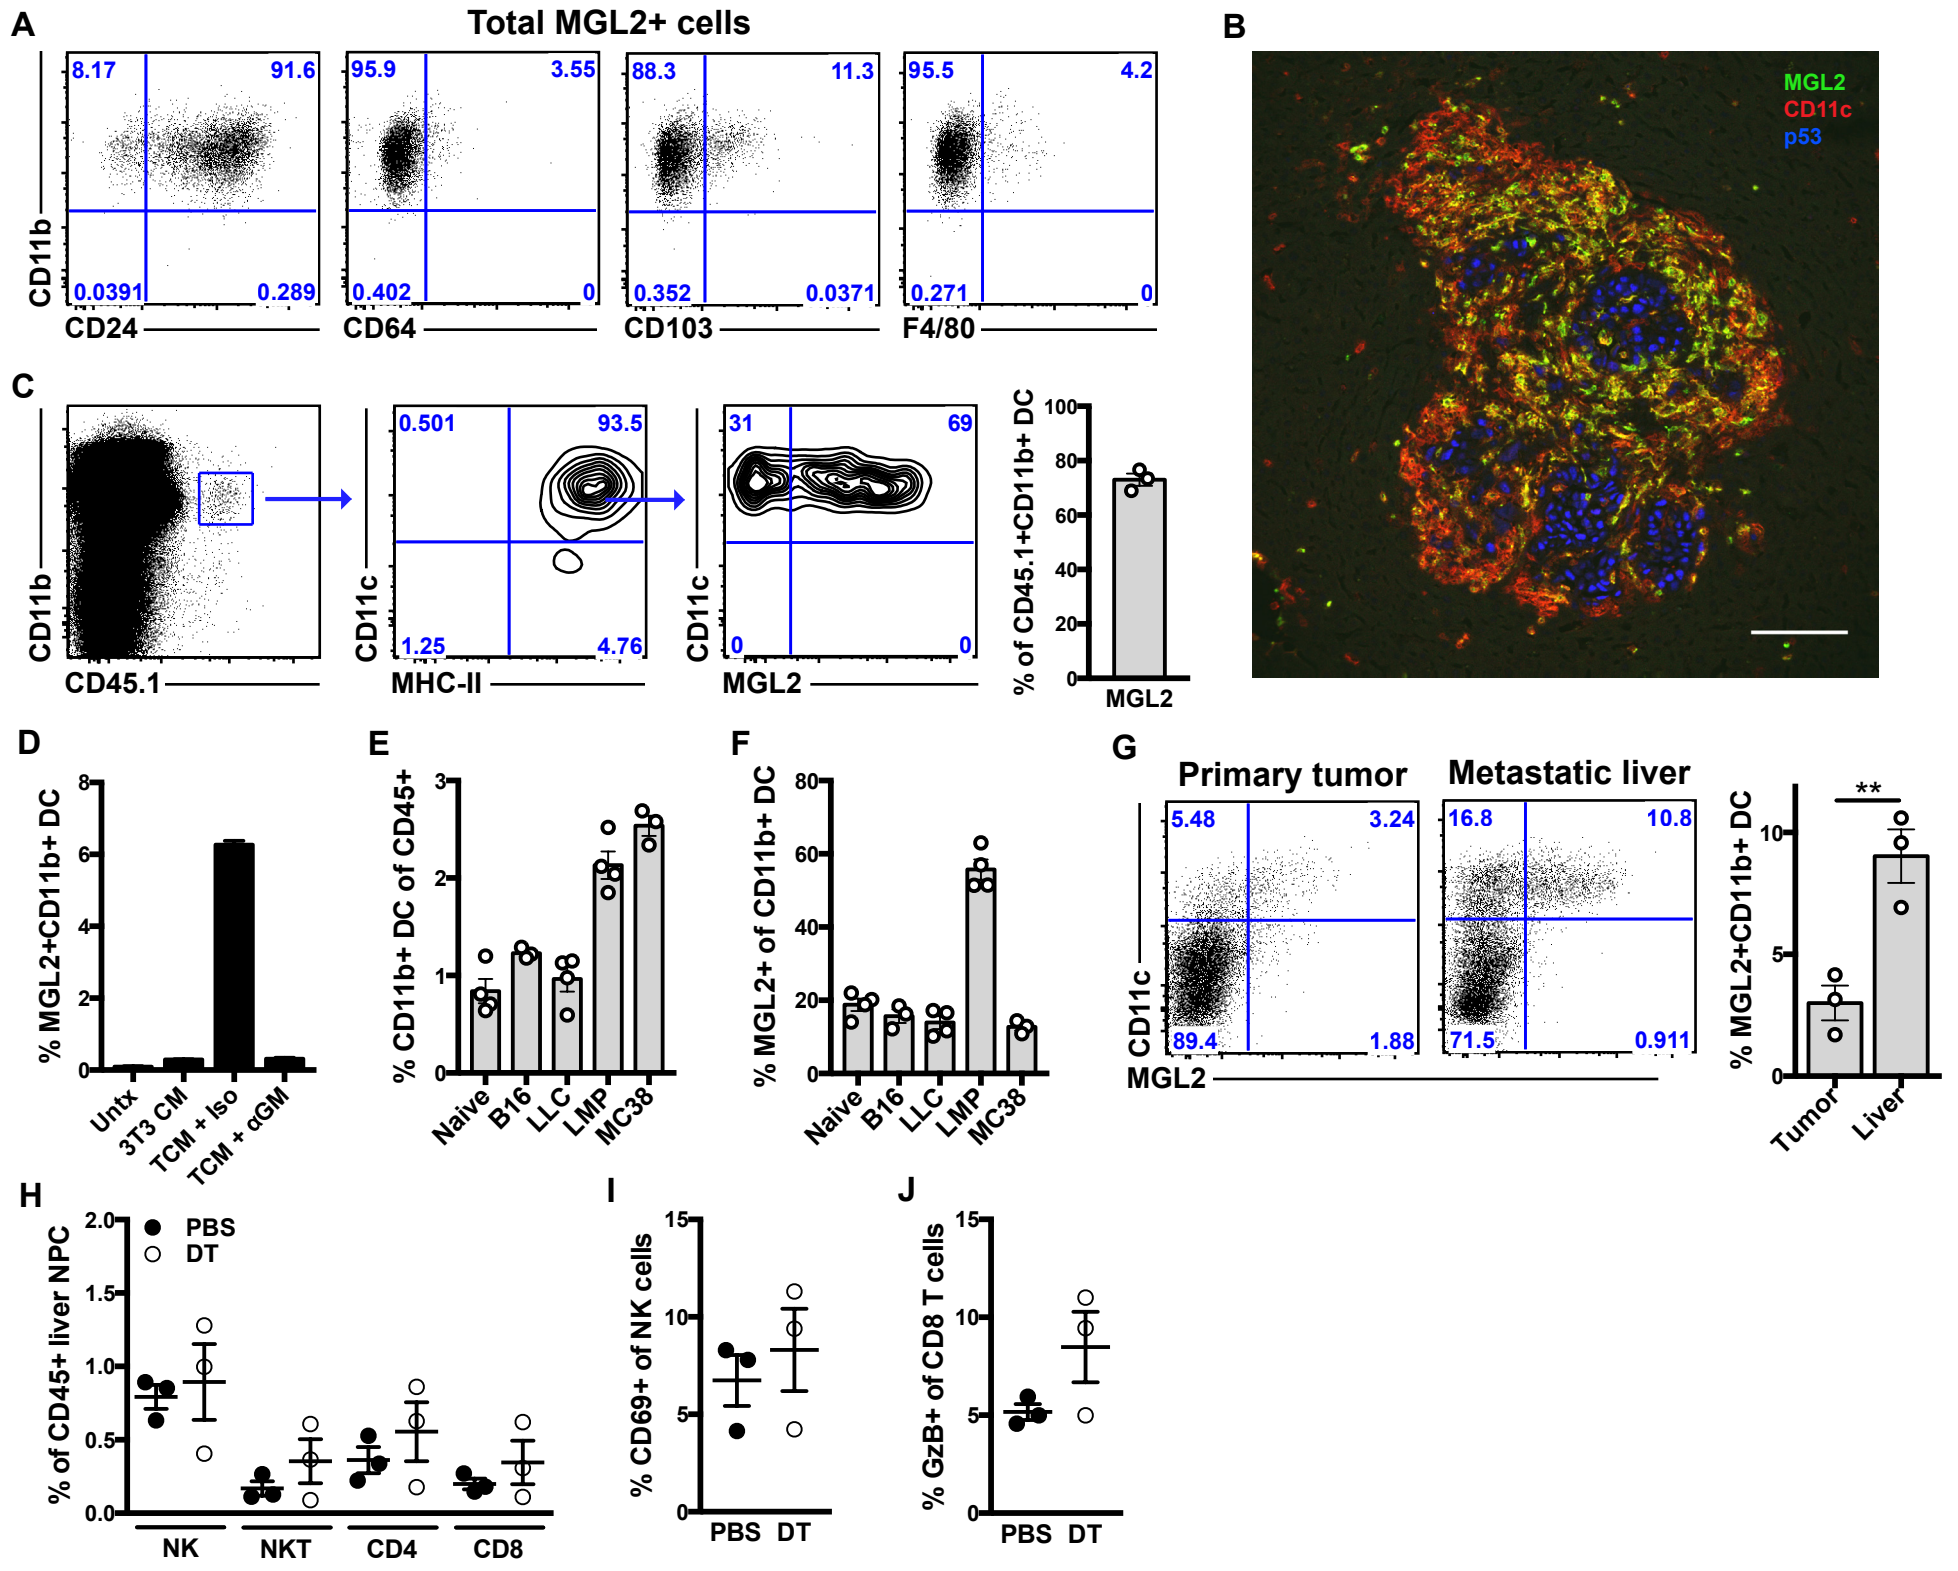

**Figure S6**

**A**

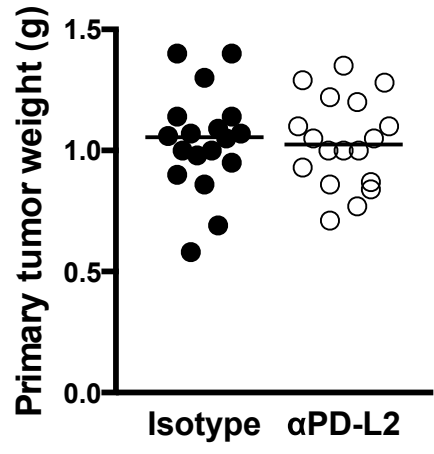

**B**

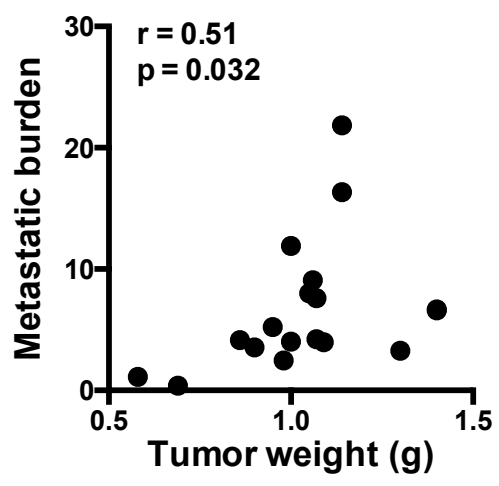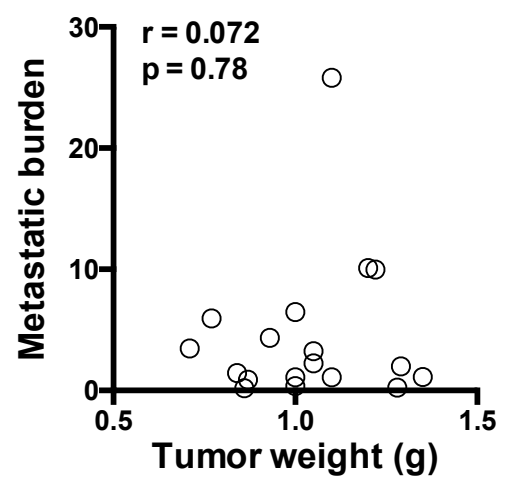



**Figure S7**

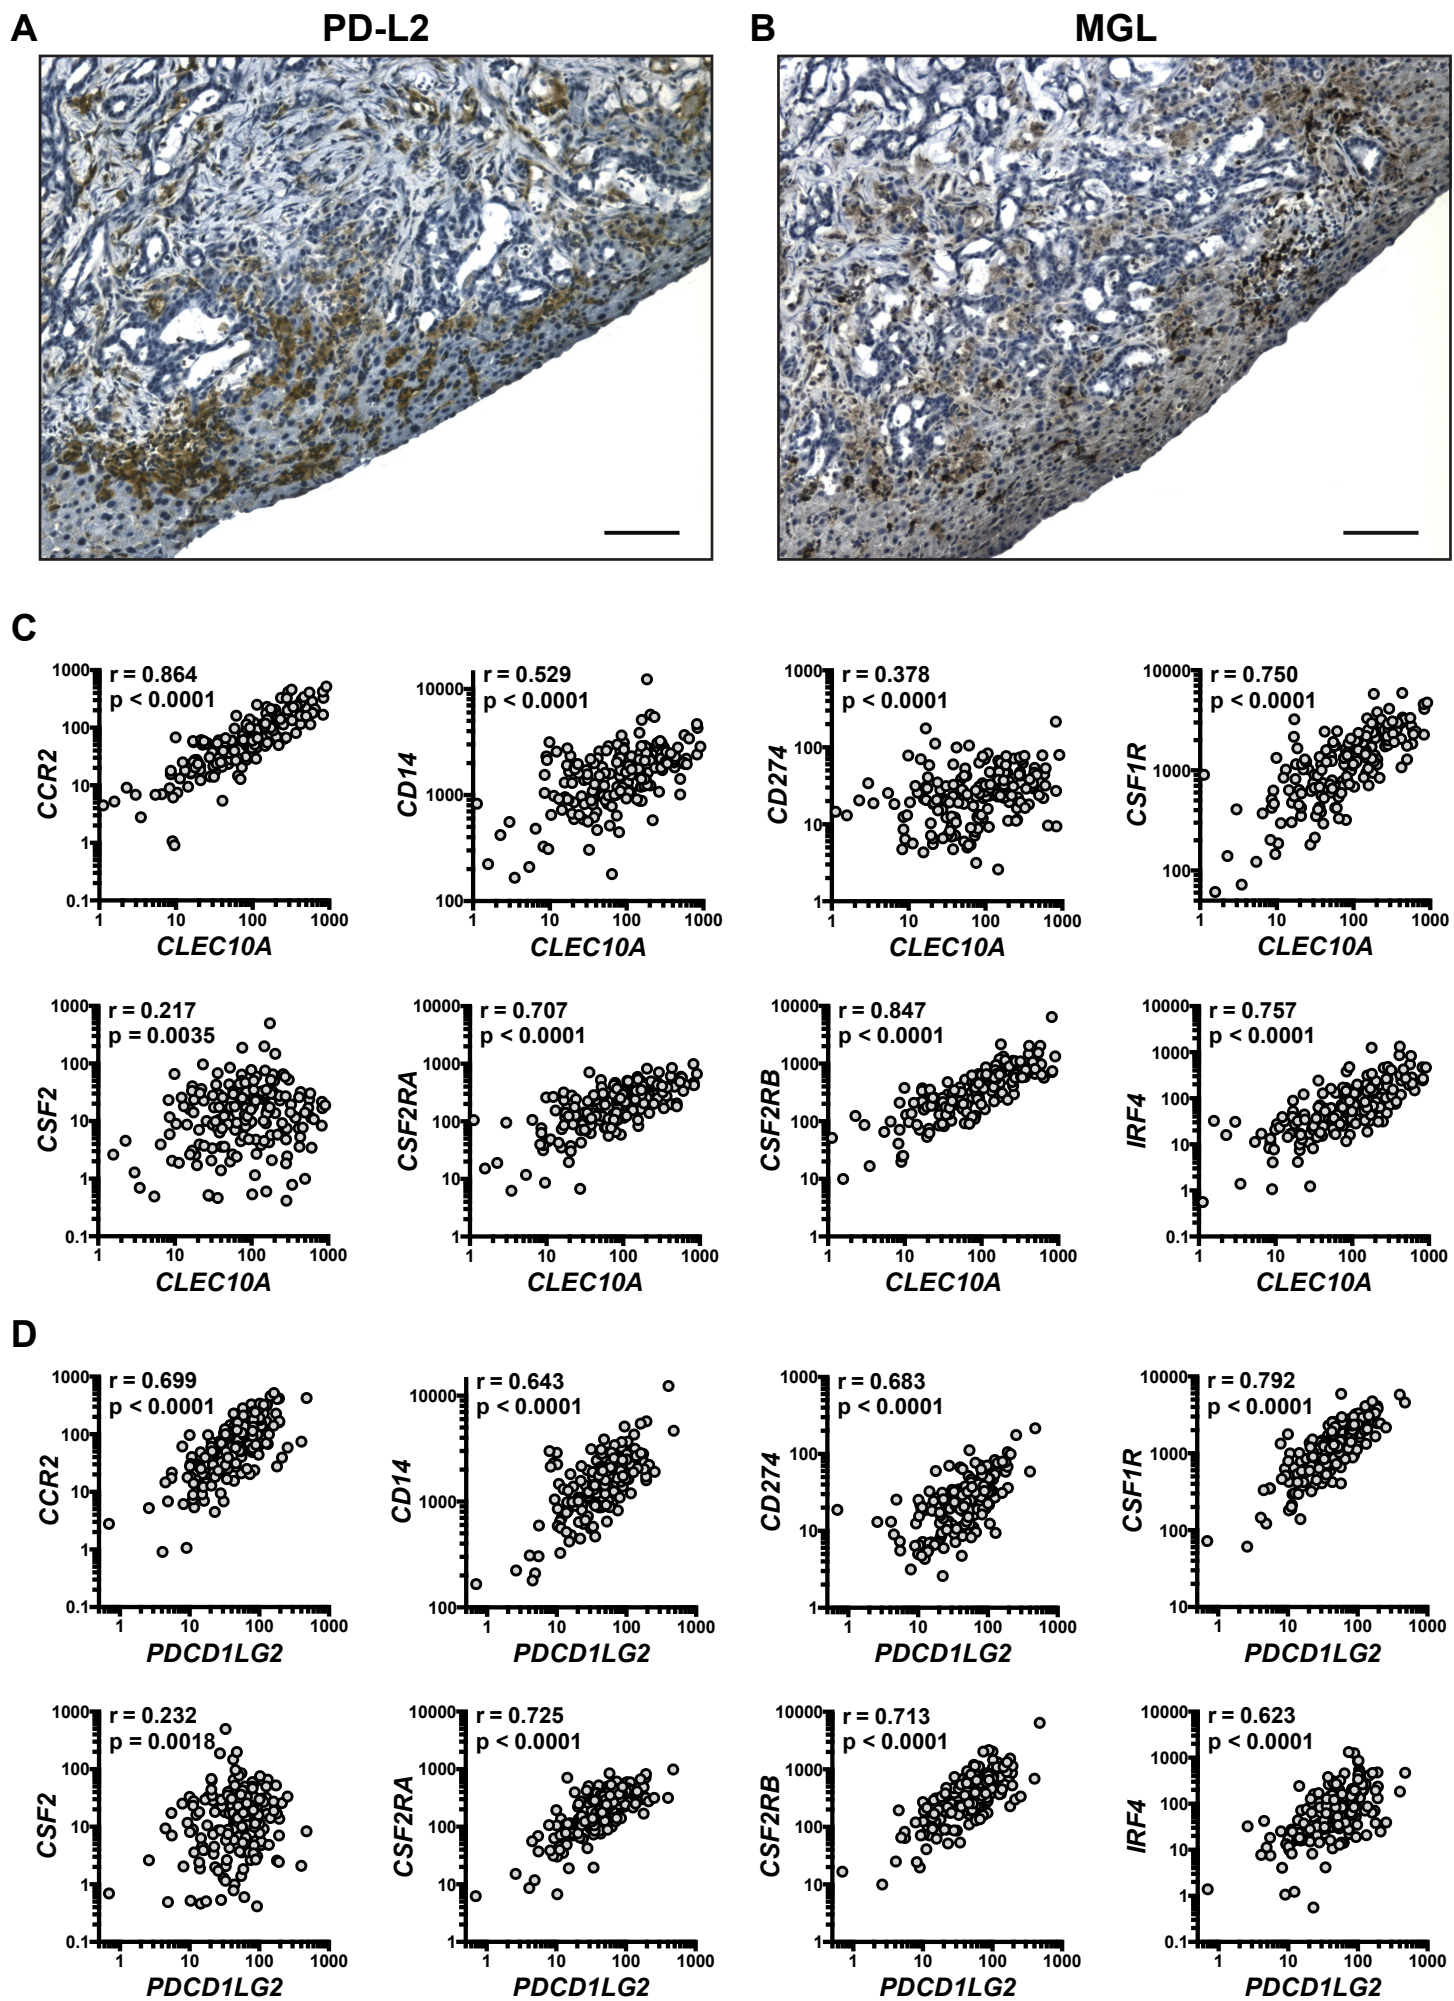

Figure S8

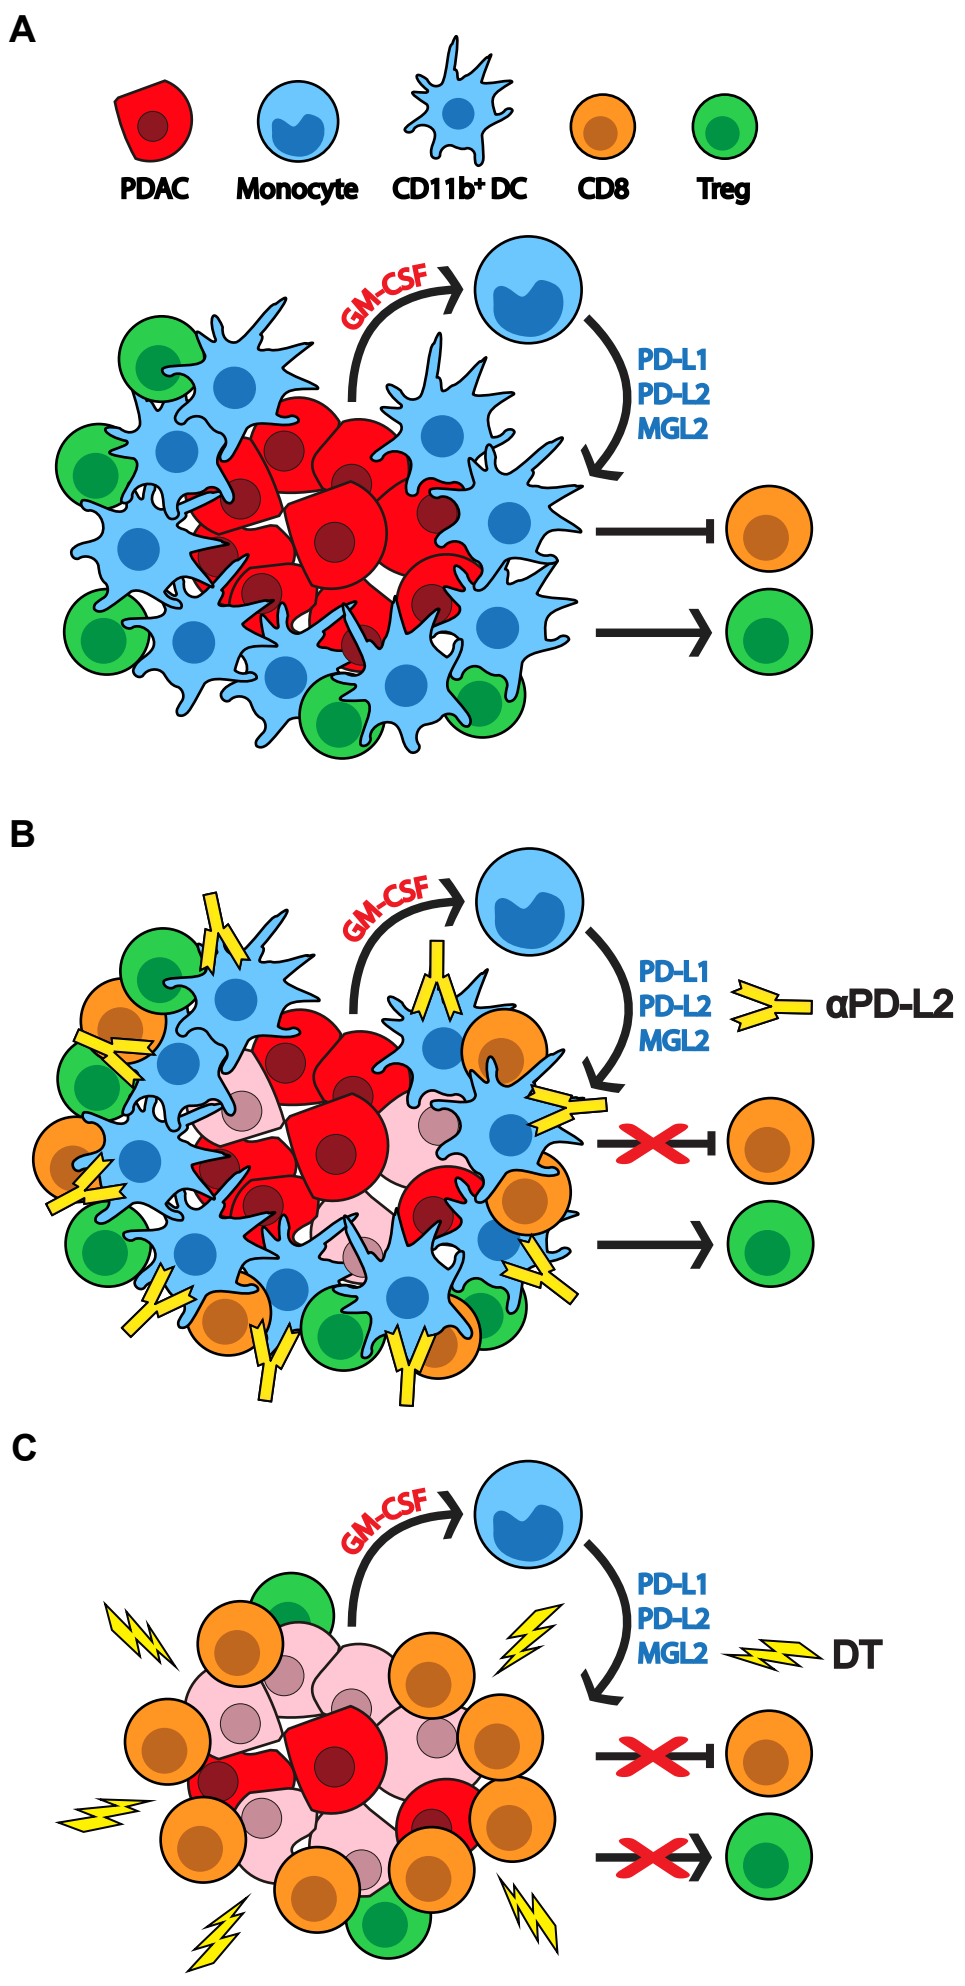

Supplement: NIHMS884829-supplement-1.pdf [file NIHMS884829-supplement-1.pdf]
